# Supplementary material for: Ionization energies in solution with the QM:QM approach
Source: Royal Society of Chemistry journal article supplement (doi:10.1039/c9cp06154a), 2020-01-01
Supplement: c9cp06154a1.pdf [file c9cp06154a1.pdf]

## **Supporting Information**

### **Ionization Energies in Solutions with QM:QM approach**

Zsuzsanna Tóth, Jakub Kubečka, Eva Muchová, Petr Slaviček\*

*University of Chemistry and Technology Prague, Department of Physical Chemistry,  
Technická 5, 16628 Prague 6, Czech Republic*

Table S1. The evolution of the calculated mean value of cytosine VIE and FWHM of the distribution with the size of the QM region. The data are presented for a simple electrostatic embedding scheme. SPC/E charges were used for water molecules. In the QM part, the BMK functional with 6-31+g\* was employed.

| # water in QM | # samples | total size of the system (QM + MM) |             |             |             |             |             |           |             |             |
|---------------|-----------|------------------------------------|-------------|-------------|-------------|-------------|-------------|-----------|-------------|-------------|
|               |           | 100                                |             | 200         |             | 400         |             | 600       |             |             |
|               |           | VIE                                | FWHM        | VIE         | FWHM        | VIE         | FWHM        | # samples | VIE         | FWHM        |
| 0             | 100       | 8.750±0.028                        | 0.668±0.048 | 8.755±0.029 | 0.680±0.053 | 8.767±0.029 | 0.670±0.050 | 400       | 8.771±0.014 | 0.647±0.022 |
| 5             | 100       | 8.630±0.028                        | 0.663±0.042 | 8.639±0.029 | 0.682±0.039 | 8.656±0.030 | 0.697±0.048 | 400       | 8.660±0.015 | 0.682±0.023 |
| 10            | 100       | 8.541±0.029                        | 0.682±0.048 | 8.558±0.029 | 0.682±0.043 | 8.567±0.029 | 0.689±0.045 | 400       | 8.566±0.014 | 0.672±0.022 |
| 20            | 100       | 8.420±0.029                        | 0.675±0.047 | 8.433±0.029 | 0.676±0.043 | 8.444±0.029 | 0.671±0.041 | 400       | 8.460±0.014 | 0.664±0.022 |
| 40            | 50        | 8.267±0.042                        | 0.695±0.074 | 8.313±0.044 | 0.725±0.066 | 8.326±0.043 | 0.721±0.054 | 100       | 8.341±0.029 | 0.678±0.049 |
| 60            | 50        | 8.156±0.046                        | 0.768±0.080 | 8.262±0.044 | 0.740±0.049 | 8.274±0.044 | 0.733±0.056 | 50        | 8.314±0.043 | 0.716±0.056 |

Table S2. Calculated mean values of the VIE for clusters of cytosine and water. The system contained altogether 400 water molecules, from 5 to 40 water molecules explicitly calculated at the BMK and PBE/6-31+g\* levels, the remaining molecules were represented by SPC/E water charges. Data presented in the table were obtained for a cluster cut from a box simulation.

| # water in QM | BMK         |                   |                   | PBE         |                   |                   |
|---------------|-------------|-------------------|-------------------|-------------|-------------------|-------------------|
|               | VIE         | $Q^0(\text{cyt})$ | $Q^+(\text{cyt})$ | VIE         | $Q^0(\text{cyt})$ | $Q^+(\text{cyt})$ |
| 5             | 8.656±0.030 | 0.102±0.005       | 0.996±0.006       | 8.098±0.027 | 0.114±0.006       | 0.733±0.008       |
| 10            | 8.567±0.029 | 0.155±0.008       | 0.983±0.009       | 7.894±0.025 | 0.175±0.008       | 0.642±0.009       |
| 20            | 8.444±0.029 | 0.187±0.010       | 0.952±0.011       | 7.635±0.023 | 0.213±0.011       | 0.552±0.012       |
| 40            | 8.326±0.043 | 0.146±0.015       | 0.914±0.014       | 7.344±0.034 | 0.156±0.016       | 0.423±0.019       |

*Table S3. VIE of cytosine within the QM:QM model as a function of an increasing system size. We consider either 0 (QM0) or 5 (QM5) water molecules together with cytosine in the QM fragment. In the QM:QM scheme, the BMK functional with the 6-31+g\* basis set was used. The results are presented for clusters obtained either from classical simulations of a given cluster size in vacuo (S1), or for clusters obtained by cutting from a large box simulation (S2). The results were averaged over 400 samples.*

| #water | S1, QM0     |             | S1, QM5     |             | S2, QM0     |             |
|--------|-------------|-------------|-------------|-------------|-------------|-------------|
|        | VIE         | FWHM        | VIE         | FWHM        | VIE         | FWHM        |
| 0      | 8.736±0.001 | 0.033±0.004 | -           | -           | 8.732±0.008 | 0.395±0.031 |
| 50     | 8.588±0.019 | 0.893±0.037 | 8.556±0.018 | 0.865±0.036 | 8.490±0.016 | 0.737±0.025 |
| 100    | 8.529±0.025 | 1.188±0.047 | 8.495±0.025 | 1.162±0.046 | 8.399±0.014 | 0.671±0.023 |
| 200    | 8.459±0.019 | 0.899±0.041 | 8.427±0.019 | 0.879±0.040 | 8.344±0.014 | 0.677±0.023 |
| 400    | 8.367±0.015 | 0.724±0.023 | 8.336±0.015 | 0.698±0.026 | 8.290±0.015 | 0.688±0.024 |
| 600    | 8.368±0.015 | 0.713±0.023 | 8.344±0.015 | 0.697±0.022 | 8.274±0.014 | 0.680±0.022 |

Table S4. Statistical convergence of VIE with the number of samples. Simulation for clusters in vacuo, QM:QM scheme, BMK functional with 6-31+g\* basis set.

| #water  | 0           | 50          | 100          | 200         | 400         | 600         |
|---------|-------------|-------------|--------------|-------------|-------------|-------------|
| #sample |             |             |              |             |             |             |
| 100     | 8.737±0.002 | 8.564±0.030 | 8.525±0.048  | 8.441±0.035 | 8.373±0.029 | 8.377±0.028 |
| 200     | 8.736±0.001 | 8.574±0.024 | 8.504±0.0344 | 8.476±0.027 | 8.372±0.021 | 8.393±0.021 |
| 300     | 8.736±0.001 | 8.576±0.021 | 8.537±0.029  | 8.470±0.022 | 8.370±0.018 | 8.372±0.018 |
| 400     | 8.735±0.001 | 8.588±0.019 | 8.529±0.025  | 8.459±0.019 | 8.367±0.015 | 8.368±0.015 |
| 500     | 8.736±0.001 | 8.580±0.017 | 8.535±0.023  | 8.459±0.017 | 8.372±0.014 | 8.378±0.014 |

Table S5. Statistical convergence of the FWHM with the number of samples. Simulation for clusters in vacuo, QM:QM scheme, BMK functional with 6-31+g\* basis set.

| #water  | 0           | 50          | 100         | 200         | 400         | 600         |
|---------|-------------|-------------|-------------|-------------|-------------|-------------|
| #sample |             |             |             |             |             |             |
| 100     | 0.034±0.007 | 0.707±0.052 | 1.119±0.084 | 0.830±0.060 | 0.689±0.046 | 0.660±0.043 |
| 200     | 0.029±0.005 | 0.816±0.047 | 1.147±0.060 | 0.894±0.047 | 0.691±0.031 | 0.687±0.029 |
| 300     | 0.028±0.003 | 0.867±0.043 | 1.168±0.049 | 0.894±0.044 | 0.713±0.031 | 0.715±0.025 |
| 400     | 0.034±0.004 | 0.893±0.037 | 1.188±0.047 | 0.899±0.041 | 0.710±0.026 | 0.713±0.023 |
| 500     | 0.035±0.004 | 0.912±0.033 | 1.183±0.043 | 0.917±0.037 | 0.724±0.023 | 0.718±0.021 |
